# Supplementary material for: Gnp4/LAX2, a RAWUL protein, interferes with the OsIAA3–OsARF25 interaction to regulate grain length via the auxin signaling pathway in rice
Source: PubMed Central journal article supplement (PMC6137978; doi:10.1093/jxb/ery256), 2018-07-28
Supplement: ery256_suppl_supplementary-tables-s1-s5.pdf [file ery256_suppl_supplementary-tables-s1-s5.pdf]

## Supplemental tables

**Table S1. Gnp4/LAX2- interacting proteins isolated by yeast two-hybrid assays**

| ID    | MSU_ID         | Annotation                                                       |
|-------|----------------|------------------------------------------------------------------|
| GIP1  | LOC_Os06g44450 | CCT/B-box zinc finger protein, putative, expressed               |
| GIP2  | LOC_Os06g06530 | proline-rich cell wall protein-like, putative, expressed         |
| GIP3  | LOC_Os07g43720 | DCN1, putative, expressed                                        |
| GIP4  | LOC_Os05g34070 | DIP1, putative, expressed                                        |
| GIP5  | LOC_Os05g28980 | drought induced 19 protein, putative, expressed                  |
| GIP6  | LOC_Os01g48190 | drought induced 19 protein, putative, expressed                  |
| GIP7  | LOC_Os05g02070 | expressed protein                                                |
| GIP8  | LOC_Os02g05710 | expressed protein                                                |
| GIP9  | LOC_Os03g58070 | frigida, putative, expressed                                     |
| GIP10 | LOC_Os08g42740 | IBR domain containing protein, putative, expressed               |
| GIP11 | LOC_Os02g38050 | joka2, putative, expressed                                       |
| GIP12 | LOC_Os03g07880 | nuclear transcription factor Y subunit, putative, expressed      |
| GIP13 | LOC_Os03g22740 | nucleolar protein NOP5-1, putative, expressed                    |
| GIP14 | LOC_Os05g14180 | OslAA17 - Auxin-responsive Aux/IAA gene family member, expressed |
| GIP15 | LOC_Os01g13030 | OslAA3 - Auxin-responsive Aux/IAA gene family member, expressed  |
| GIP16 | LOC_Os04g52050 | TNP1, putative, expressed                                        |
| GIP17 | LOC_Os10g42410 | zinc-binding protein, putative, expressed                        |
| GIP18 | LOC_Os06g47890 | OsFBO9 - F-box and other domain containing protein, expressed    |
| GIP19 | LOC_Os01g17390 | OsFBX5 - F-box domain containing protein, expressed              |
| GIP20 | LOC_Os02g36974 | 14-3-3 protein, putative, expressed                              |
| GIP21 | LOC_Os03g28940 | OsJAZ6, ZIM domain containing protein, putative, expressed       |
| GIP22 | LOC_Os04g02820 | elongation factor, putative, expressed                           |
| GIP23 | LOC_Os02g37290 | Heavy metal transport protein                                    |

**Table S2. Enriched GO terms in significant DEGs.**

| GO term    | Ontology | Description                                                                         | Number in input list | Number in BG/Ref | p-value     | FDR        |
|------------|----------|-------------------------------------------------------------------------------------|----------------------|------------------|-------------|------------|
| GO:006350  | P        | transcription                                                                       | 120                  | 1336             | 3.1E-14     | 2.5E-11    |
| GO:0031323 | P        | regulation of cellular metabolic process                                            | 116                  | 1295             | 1E-13       | 2.5E-11    |
| GO:0045449 | P        | regulation of transcription                                                         | 113                  | 1237             | 6.8E-14     | 2.5E-11    |
| GO:0019219 | P        | regulation of nucleobase, nucleoside, nucleotide and nucleic acid metabolic process | 113                  | 1243             | 9.1E-14     | 2.5E-11    |
| GO:0009889 | P        | regulation of biosynthetic process                                                  | 113                  | 1261             | 2.2E-13     | 2.6E-11    |
| GO:0010556 | P        | regulation of macromolecule biosynthetic process                                    | 113                  | 1261             | 2.2E-13     | 2.6E-11    |
| GO:0031326 | P        | regulation of cellular biosynthetic process                                         | 113                  | 1261             | 2.2E-13     | 2.6E-11    |
| GO:0010468 | P        | regulation of gene expression                                                       | 114                  | 1279             | 2.4E-13     | 2.6E-11    |
| GO:0051171 | P        | regulation of nitrogen compound metabolic process                                   | 113                  | 1261             | 2.2E-13     | 2.6E-11    |
| GO:0019222 | P        | regulation of metabolic process                                                     | 118                  | 1381             | 1.2E-12     | 1.1E-10    |
| GO:0006355 | P        | regulation of transcription, DNA-dependent                                          | 79                   | 758              | 1.5E-12     | 1.3E-10    |
| GO:0051252 | P        | regulation of RNA metabolic process                                                 | 79                   | 760              | 1.7E-12     | 1.4E-10    |
| GO:0080090 | P        | regulation of primary metabolic process                                             | 114                  | 1326             | 2.1E-12     | 1.6E-10    |
| GO:0060255 | P        | regulation of macromolecule metabolic process                                       | 115                  | 1345             | 2.3E-12     | 1.6E-10    |
| GO:0006351 | P        | transcription, DNA-dependent                                                        | 81                   | 799              | 2.8E-12     | 1.8E-10    |
| GO:0032774 | P        | RNA biosynthetic process                                                            | 81                   | 801              | 3.2E-12     | 1.9E-10    |
| GO:0050794 | P        | regulation of cellular process                                                      | 131                  | 1699             | 4.6E-11     | 2.6E-09    |
| GO:0065007 | P        | biological regulation                                                               | 141                  | 1936             | 3E-10       | 0.00000016 |
| GO:0050789 | P        | regulation of biological process                                                    | 134                  | 1814             | 3.8E-10     | 0.00000002 |
| GO:0016070 | P        | RNA metabolic process                                                               | 90                   | 1078             | 2.1E-09     | 0.0000001  |
| GO:0034645 | P        | cellular macromolecule biosynthetic process                                         | 142                  | 2125             | 0.000000047 | 0.0000022  |
| GO:0009059 | P        | macromolecule biosynthetic process                                                  | 142                  | 2128             | 0.000000051 | 0.0000023  |
| GO:0010467 | P        | gene expression                                                                     | 133                  | 1995             | 0.00000015  | 0.0000065  |
| GO:0006139 | P        | nucleobase, nucleoside, nucleotide and nucleic acid metabolic process               | 151                  | 2424             | 0.00000094  | 0.000038   |
| GO:0044249 | P        | cellular biosynthetic process                                                       | 162                  | 2735             | 0.0000059   | 0.00023    |
| GO:0044260 | P        | cellular macromolecule metabolic process                                            | 246                  | 4546             | 0.0000098   | 0.00037    |
| GO:0009058 | P        | biosynthetic process                                                                | 167                  | 2873             | 0.000011    | 0.00042    |
| GO:0006807 | P        | nitrogen compound metabolic process                                                 | 163                  | 2801             | 0.000014    | 0.00049    |
| GO:0043170 | P        | macromolecule metabolic process                                                     | 268                  | 5122             | 0.000037    | 0.0013     |
| GO:0009415 | P        | response to water                                                                   | 7                    | 24               | 0.00018     | 0.006      |
| GO:0044238 | P        | primary metabolic process                                                           | 322                  | 6478             | 0.00022     | 0.0069     |
| GO:0006950 | P        | response to stress                                                                  | 44                   | 611              | 0.00063     | 0.019      |
| GO:0050896 | P        | response to stimulus                                                                | 60                   | 917              | 0.00072     | 0.021      |
| GO:0044237 | P        | cellular metabolic process                                                          | 287                  | 5837             | 0.0012      | 0.033      |
| GO:0003700 | F        | transcription factor activity                                                       | 57                   | 469              | 1.1E-11     | 6.2E-09    |
| GO:0030528 | F        | transcription regulator activity                                                    | 74                   | 759              | 1.3E-10     | 0.00000039 |
| GO:0003677 | F        | DNA binding                                                                         | 136                  | 1859             | 5E-10       | 0.00000097 |
| GO:0005488 | F        | binding                                                                             | 459                  | 9475             | 0.000032    | 0.0037     |
| GO:0003676 | F        | nucleic acid binding                                                                | 165                  | 2881             | 0.000028    | 0.0037     |
| GO:0005634 | C        | nucleus                                                                             | 125                  | 1653             | 4.2E-10     | 0.00000007 |

**Table S3. Significantly enriched protein domains of up- and down-regulated genes in *Gnp4/LAX2*-overexpression compared to wild-type plants.**

| Category       | Term             | Count | Percentage(%) | P-Value     | Genes                                                                                                                                                                                                                                                                                                                                                                      | List Total | Pop Hits | Pop Total | Fold Enrichment | Bonferroni | Benjamini | FDR   |
|----------------|------------------|-------|---------------|-------------|----------------------------------------------------------------------------------------------------------------------------------------------------------------------------------------------------------------------------------------------------------------------------------------------------------------------------------------------------------------------------|------------|----------|-----------|-----------------|------------|-----------|-------|
|                | SM00380:AP2      | 26    | 3.576341128   | 5.14E-14    | OS09G0522100, OS02G0657000, OS05G0497300, OS01G0693400, OS02G0764700, OS01G0313300, OS06G0127100, OS04G0529100, OS03G0183300, OS07G0674800, OS04G0546800, OS04G0610400, OS01G0797600, OS02G0654700, OS04G0550200, OS06G0399000, OS06G0474000, OS05G0361700, OS05G0457800, OS05G0497200, OS05G0473300, OS04G0399800, OS03G0191900, OS02G0677300, OS04G0668200, OS09G0522000 | 221        | 109      | 6051      | 6.531           | 0.000      | 0.000     | 0.000 |
|                | SM00774:WRKY     | 12    | 1.650618982   | 0.0000428   | OS06G0649000, OS01G0756100, OS02G0265200, OS01G0621600, OS04G0287400, OS05G0343400, OS02G0462800, OS01G0826400, OS09G0334500, OS01G0246700, OS01G0624700, OS05G0322900                                                                                                                                                                                                     | 221        | 71       | 6051      | 4.628           | 0.003      | 0.002     | 0.045 |
| Up-regulated   | SM00054:EFh      | 15    | 2.063273728   | 0.000102    | OS04G0492800, OS01G0135700, OS01G0955100, OS05G0223000, OS06G0172200, OS03G0743500, OS08G0564040, OS01G0948500, OS07G0681400, OS03G0331700, OS05G0380900, OS09G0412300, OS05G0585500, OS02G0126400, OS04G0584600                                                                                                                                                           | 221        | 120      | 6051      | 3.423           | 0.007      | 0.002     | 0.106 |
|                | SM00331:PP2C_SIG | 11    | 1.5130674     | 0.000474    | OS03G0207400, OS05G0457200, OS09G0325700, OS01G0656200, OS01G0295700, OS01G0846300, OS03G0292100, OS03G0821300, OS03G0268600, OS03G0761100, OS01G0583100                                                                                                                                                                                                                   | 221        | 78       | 6051      | 3.861           | 0.034      | 0.009     | 0.493 |
|                | SM00332:PP2Cc    | 11    | 1.5130674     | 0.000474    | OS03G0207400, OS05G0457200, OS09G0325700, OS01G0656200, OS01G0295700, OS01G0846300, OS03G0292100, OS03G0821300, OS03G0268600, OS03G0761100, OS01G0583100                                                                                                                                                                                                                   | 221        | 78       | 6051      | 3.861           | 0.034      | 0.009     | 0.493 |
| Down-regulated | SM00028:TPR      | 10    | 2.83286119    | 0.000296687 | OS04G0352400, OS07G0455100, OS08G0130300, OS05G0374500, OS01G0273500, OS03G0880200, OS03G0308800, OS01G0616300, OS05G0717400, OS04G0645100                                                                                                                                                                                                                                 | 124        | 107      | 6051      | 4.561           | 0.023      | 0.023     | 0.315 |

**Table S4. DEGs containing AP2 domains in *Gnp4/LAX2*-overexpression compared to wild-type plants.**

| Gene-ID      | Gene Name                  | FDR         | log2FC      | AuxRE(TGCTC) sites                           |
|--------------|----------------------------|-------------|-------------|----------------------------------------------|
| Os01g0313300 | <i>OsERF68</i>             | 0.000000727 | 1.704051459 | -1560~-1555                                  |
| Os01g0693400 | <i>AP2/EREBP127</i>        | 0.0000394   | 1.291098707 |                                              |
| Os01g0797600 | <i>OsERF3/OsAP2-37</i>     | 0.00000148  | 1.304742366 | -106~-101, -407~-402                         |
| Os02g0638650 | <i>OsERF141</i>            | 0           | 2.450901144 | -454~-449                                    |
| Os02g0654700 | <i>OsERF91/OsBIERF3</i>    | 0.001397606 | 2.235439953 |                                              |
| Os02g0657000 | <i>OsERF35/ARAG1</i>       | 0.00346141  | 1.390733782 | -1924~-1919, -682~-677                       |
| Os02g0676800 | <i>OsERF20</i>             | 0           | 3.581204701 |                                              |
| Os02g0677300 | <i>OsERF25/OsDREB1G</i>    | 0           | 3.15988512  | -1842~-1837, -333~-328                       |
| Os02g0764700 | <i>OsERF103/OsDERF5</i>    | 0           | 3.559439681 | -680~-675                                    |
| Os03g0183300 | <i>OsERF64</i>             | 0.000221008 | 1.103327127 | -1436~-1431, -514~-509                       |
| Os03g0191900 | <i>OsERF47</i>             | 0           | 2.623410377 |                                              |
| Os04g0399800 | <i>OsERF82</i>             | 0.000209479 | 2.386204889 | -1988~-1983                                  |
| Os04g0529100 | <i>OsERF45</i>             | 0.006357848 | 1.387944484 |                                              |
| Os04g0546800 | <i>OsERF1</i>              | 0.00000427  | 1.56306824  | -1977~-1972, -1652~-1647, -1172~-1167        |
| Os04g0550200 | <i>OsERF34</i>             | 2.68E-12    | 1.837179625 |                                              |
| Os04g0610400 | <i>OsERF77/OsAP2-39</i>    | 8.88E-16    | 1.946749093 | -782~-777                                    |
| Os04g0669200 | <i>OsERF76</i>             | 4.37E-08    | 1.520373884 | -1071~-1066                                  |
| Os05g0361700 | <i>OsERF61</i>             | 0.000000418 | 1.373219003 |                                              |
| Os05g0389000 | <i>OsERF142</i>            | 0.000603571 | 2.420469575 | -1187~-1182, -442~-437, -372~-367, -272~-267 |
| Os05g0473300 | <i>OsERF43</i>             | 0.0000659   | 3.357931515 | -33~-28, -1991~-1986, -836~-831              |
| Os05g0497200 | <i>OsERF130/MFS1</i>       | 0.0000018   | 1.367061989 |                                              |
| Os05g0497300 | <i>OsERF74</i>             | 2.74E-11    | 1.648698845 | -1518~-1513                                  |
| Os06g0127100 | <i>OsERF26/DREB1C/CBF1</i> | 0           | 4.932272731 | -217~-222                                    |
| Os07g0674800 | <i>OsERF67</i>             | 0           | 3.599954454 | -1633~-1628                                  |
| Os08g0474000 | <i>OsERF104/DERF3</i>      | 0           | 5.120850387 |                                              |
| Os09g0457900 | <i>OsERF102/OsEATB</i>     | 0           | 4.241677944 |                                              |
| Os09g0522000 | <i>OsERF31/OsDREB1B</i>    | 0.004577427 | 2.554335891 | -1315~-1310                                  |
| Os09g0522100 | <i>OsERF133/OsDREB1H</i>   | 0.00000215  | 2.786528783 | -1478~-1473                                  |

**Table S5. The nucleotide diversity of *Gnp4/LAX2***

| <b>Taxon</b>         | <b>N</b> | <b>S</b> | <b>H</b> | <b><math>\pi_T</math></b> | <b>Tajima's <i>D</i></b> | <b>Fu Li's <i>D</i></b> |
|----------------------|----------|----------|----------|---------------------------|--------------------------|-------------------------|
| Wild rice            | 9        | 434      | 9        | 0.0021                    | 0.16657                  | 0.16945                 |
| <i>O. sativa</i>     | 249      | 665      | 205      | 0.00211                   | 1.6408                   | -0.94294                |
| <i>ssp. japonica</i> | 95       | 367      | 54       | 0.00016                   | -2.82607***              | -8.95937**              |
| <i>ssp. indica</i>   | 154      | 630      | 154      | 0.00093                   | -1.15007                 | -0.37515                |

N, total number of accession sequences; S, number of polymorphic (segregating) sites; H, number of haplotypes;  $\pi_T$ , average number of nucleotide differences per site calculated based on the total number of polymorphic sites; \*\* $P < 0.01$ , \*\*\* $P < 0.001$ .
