# Supplementary material for: Gnp4/LAX2, a RAWUL protein, interferes with the OsIAA3–OsARF25 interaction to regulate grain length via the auxin signaling pathway in rice
Source: PubMed Central journal article supplement (PMC6137978; doi:10.1093/jxb/ery256), 2018-07-28
Supplement: ery256_suppl_supplementary_dataset-s1.pdf [file ery256_suppl_supplementary_dataset-s1.pdf]

Saturday, March 11, 2017 04:29 PM

```

Majority      XXXXXXXXXXXXXXXXXXXXXXXXXXXXXXXXXXXXXXXXXXXXXXXXXXXXXXXXXXXXXXXXXXXXXXXXXXXXXXXXXXXXXXXX
              |-----|-----|-----|-----|-----|-----|-----|-----|
              10          20          30          40          50          60          70          80
Gnp4                              |-----|-----|-----|-----|-----|-----|-----|-----| 81
Sb06g014520                       |-----|-----|-----|-----|-----|-----|-----|-----| 81
XP_003579650.1                      |-----|-----|-----|-----|-----|-----|-----|-----| 81
XP_008663842.1                       |-----|-----|-----|-----|-----|-----|-----|-----| 81
Os12g0600200                               |-----|-----|-----|-----|-----|-----|-----|-----| 81
Os03g0632800  MQPAPASPPKADGGEDEEEEECSRAVVKEEPHHQQEEDDDDAAAAADGGEDEKEKVEEEEVEERGRRRRGRPRGRKRGRSSGG 81
Os03g0798200                               |-----|-----|-----|-----|-----|-----|-----|-----| 81
Os03g0741700                               |-----|-----|-----|-----|-----|-----|-----|-----| 81
Os12g0479100                               |-----|-----|-----|-----|-----|-----|-----|-----| 81
Os01g0928400                               |-----|-----|-----|-----|-----|-----|-----|-----| 81
At1g06770                                |-----|-----|-----|-----|-----|-----|-----|-----| 81
At3g23060                                |-----|-----|-----|-----|-----|-----|-----|-----| 81
At2g30580                                |-----|-----|-----|-----|-----|-----|-----|-----| 81
At1g28080                                |-----|-----|-----|-----|-----|-----|-----|-----| 81
At5g13250                                |-----|-----|-----|-----|-----|-----|-----|-----| 81

```

```

Majority      XXXXXXXXXXXXXXXXXXXXXXXXXXXXXXX- - - - XCXLLRDATTI SECLH- TFCRXCI XEKI TDEEVESCPVCNI DLGHRPLEK
              |-----|-----|-----|-----|-----|-----|-----|-----|
              90          100         110         120         130         140         150         160
Gnp4                MVPARSLAHPH- - - - PHLVRRRRRDHAAAAHGATARCDDDDDGVVTPRGPTRYMAQEPI NHHQHQH- 156
Sb06g014520          MVPARN      - - - - LQPPLLRDAHATPCAAAAAG      LGVTPTAASSSHMAQEPI DKHHSEPS 157
XP_003579650.1       MVPAR        - - - - NLQLLRDEHGTPPFVAR      GVDAVTAQPHHMAQEPI NQESPKP- 156
XP_008663842.1          - - - - -                                     MAQDPSRPHRHSSK 157
Os12g0600200                MKYAPI Y                LLTLS-CLHYAVCRKCIYKKINDEELEHCVPCKIDLGCAPLEK 161
Os03g0632800  GGSAAAAAAAAAGGVVMVKRELLARCMTCPLCGRLLRDATTVSECLH-TFCRKCIYEKLNDEEVESCPVCKIDLGCTPVEK 161
Os03g0798200  PGDAAGEEVGGGGDVVMVRRASVAACLTCPLCGRLLRDATTISECLH-TFCRKCIHEEFVDKESCCPTCNIDLGCAPLEK 161
Os03g0741700          MGAARGVRRVRREALVACMTCPLCKGLLREATAITECLH-TFCKECIMEKIDDEEVDHCPVCNI DLGCDPEEK 161
Os12g0479100                - - - - -                                     MAQDPSHPHRQS K 157
Os01g0928400                - - - - -                                     MVPARSRLFHHDSSSSSSKRGGGN 157
At1g06770          MMI KVKKETMRACLSCSICDNI LRDATTISECLH-TFCRKCIYEKITEDEIETCPVCNI DLGSTPLEK 161
At3g23060          MLTKVLSKEVKPCLACPICTNPFKDATTISECLH-TFCRSCIRNKFINERVNACPVCNVNLGVFPLEK 161
At2g30580          MEGDMVAKVKRETVVACMTCPLCDKLLRDATTISECLH-TFCRKCIYEKITEDEIESCPVCDIDLGGTPLEK 161
At1g28080                - - - - -                                     MTNMVPLESSTLFGVYGGFTDSMMMRETTTNNQDPSGD 157
At5g13250                - - - - -                                     MVSAAESSS- - - - - TSTLLLPCAFANSFAFMRLLQK 142

```

Saturday, March 11, 2017 04:29 PM

Majority L RPDHNPQDVRAKI FXXPLKRKKVQAPEVA AHVVLPAKRKERSXSSLVVXTPXVSAQAGTTGRRTKAXTRKXAGALXXXXX  
 170 180 190 200 210 220 230 240

Gnp4 - DPPKQPPPR-----EADD---DH---HRIQE-----REPLPPPTTTTRNQRLQLQLGGDGHNN----- 205  
 Sb06g014520 TKPPPPPPPPQERQQQQQA DDQHTRHAHAHREQQQQLTLR PLQPAGSSHQEAAGTSGSSSGG SSGNGGAG 238  
 XP\_003579650.1 - QQ HQVPPQ-----EEEDEQP---AVLP-PP QPAGTSGSSSG 223  
 XP\_008663842.1 DTA AQQPEPEHQHEHEQQP PAELHQLAPQAQPQPPHDVH EPA A A A S S S S S SDAGS 238  
 Os12g0600200 LRADHNLQDVRSKI F PLKRKKVNAEEVESPI APPAKRKERSI SSLVVNTPEITP KSLTGRRTRASTRKSAAALRDLGP 242  
 Os03g0632800 LRADHNLQDVRSKI F PFKRKKI SADEVAAPVLLPSKRKERSI SSLVVDTPVTPT TGLTGRRTRAVTRK AAALR---- 238  
 Os03g0798200 LRV D H S M Q F V R S R I F P F K R R K V E N P E I I C P V A S P V K R K E R S L S S L T I P A P Q V S I Q K C L T K R R T K A S C - - - - - L R 236  
 Os03g0741700 LRPDHNVDI RNKVF PLKVKKVGAP KAPT V T L P V K R K Q R S L S S L V V D T P R V A V Q T G L T G R R T K T A R R T A V S H V N S P G N 242  
 Os12g0479100 DTA-----AAP-----PPPPPEQPQQQ-----P ELITAPPPR 193  
 Os01g0928400 SSSSCTPQYCI ATQLDAAAAA PARRRHHHHHQLAMA P P E D D A A A G T S S R G G G A G D D D D G D K 238  
 At1g06770 LRPDHNLQDLRAKIF ALKRRKVKAPGI VS LPGKRKERSI SSLVVSTPMVSAQAGTTRRRTKAPTRK ELR NGS 242  
 At3g23060 LRS D C T W Q D L K L K I Y R A M M E S L K K A G P K T V A A S V K S S K K R K S R T S L R V S S S R V S S P D T P L E P A N V V E P P N V V V E E K H R 242  
 At2g30580 LRPDHI LQDLRAKLF PLKRKKERAPEVVSSI SLPKRKERSI SSLVVSTPRVSAQAGTTGKRTKA---TRK D--- 236  
 At1g28080 TCSVSDPAPGSTDYNI SSSPVKDDGTAPKNDVVCSI NVDDNKDKS WLRLGI GPEENTDGSYKLQRCCSKNGS GRE 238  
 At5g13250 THHFSAVSEDDDNKDI HLGSDHHQA KDNHHQV-----FRRECSFMADQEEPRTT SRLSSKEDDHDNNS-----NNNN 212

Majority XXXXXXXXXXXXXXXXXXXXXXXXXXXXXXXXXXXXXXXXXXXXXXXXXXXXXXXXXXXLXXXXXXXXXPQXXRXXXXXXXXXXSXSXXEXXXXXXXXXX  
 250 260 270 280 290 300 310 320

Gnp4 -----HHHHHHQE VAGTSGSSSGGSSSNNGGGG 275  
 Sb06g014520 DWLRLGLAPAYPSAA----- 292  
 XP\_003579650.1 GNSSSNGGGGG GGGDWLRLGLGPSAAA SASGT EADLFAAAD 304  
 XP\_008663842.1 SWLQLGI GGPSPPSPP RRRRPRRDD 319  
 Os12g0600200 I I P P V K K D SDNTNKNADNSS-----LDSL SKVPQTRRQVLSNAETS SHPSSKDKGGDDKD 311  
 Os03g0632800 G-----LGPGI DDPVKKE I DNGEKHAQNSS LPTNLGKVPQTRRQMSSNAEASNHSSNKDTEGDRKD 311  
 Os03g0798200 NFPLHST-----SR GSKDTSKLLGG 311  
 Os03g0741700 NGTI KLANK SEGRDHKTQKI S-----AAQSAKMTKTGNKKKNTD V D V T I Q S S S E D R K D D H T 313  
 Os12g0479100 DDVAHQ EPSTSSSSGGGGTDAAG 274  
 Os01g0928400 DWLQLGLAAAAPTATA-----PAAAAPS S S T P T A P 315  
 At1g06770 LAERTVKKE ESSGDELLESTS-----SPDTLNKFTQNK R Q S K K S C K E S I S N K E N K D G D E 311  
 At3g23060 ETVLAL-----QSTRKPI I TFQKRGRKASLP---KKI DSKPEPELPPKEPKIKNLFDLNNEPEDNGLDEAEGSTFQE 311  
 At2g30580 -----VRGSGSFTKRTVKKE EEFGDDHVESASSPETLKKFTQNK R Q S S Y A N P N Q S L S N R R N K D V D E 311  
 At1g28080 NSLELSLFSSSSTAVS-----SSI DHLPTQPLQLPYHH 310  
 At5g13250 I N N N N N N E A E D H E M R Q Q G W L R L S L G H E E D V K P D L D 293

Saturday, March 11, 2017 04:29 PM

```

Majority      XXXXXXL - WKPLNXL VXXXXXRKXXXSXXXXXXXXXXXXXXXXX - - XXXXXXXXXXXXXXXXXXXXXXXXXXXXXXXXXXXXXXXXXXXX
                    330          340          350          360          370          380          390          400

Gnp4          TRDW- LRL ATGPASPGASAGSDHDLFPSTTTTAPAPQPPTP- - - TPTPTPTPTPRHHHHDVLLVLPG  MP PPGSFLRPGP  352
Sb06g014520  ----- THPGVAFAADRRAAGPPSPLLLSSEPQRP- - - P  PPPPLLSSQRPPG  - - - - MG- - FPPGPFLHQAA  352
XP_003579650.1      -                        RGPRQEMLVLPALDMPMP- - - GAFPRPG  - - - - - - - - - - - - - - - - - - - -  369
XP_008663842.1      -                        - - - - - - - - - - - - - - - - - - - - - - - - - - - - - - - - - - - - - -  388
Os12g0600200      LDKS  EL- WRPLNCLVEAASKTKSYRSSS  AARGNQPT  ESP  SSANASRTKAREY  391
Os03g0632800      LADKTDEL- WRPLNCLVE- - - - - - - - - - - - - - - - - - - - - - - - - - - - - - - - - - - - - - -  371
Os03g0798200      - WRPLGCQLKLGKDKKSLKSSVKDTNRTKSKSG  DTD  DGAPASKAKAREP  391
Os03g0741700      I - - DKEDL- KKPLNSLVDTANRTKFFRS  GPKGQAAKEDI - - - - - - - - - - - - - - - - - - - - - - - - - -  375
Os12g0479100      LSLQLGLGPSAPGSPSSSRKR- - - - - - - - - - - - - - - - - - - - - - - - - - - - - - - - - - - - - -  343
Os01g0928400      - - - - - - - - - - - - - - - - - - - - - - - - - - - - - - - - - - - - - - - - - - - - - - - -  387
At1g06770        PWDSKMD - WKPLN- - - - - - - - - - - - - - - - - - - - - - - - - - - - - - - - - - - - - - - - - -  374
At3g23060        VVPKEKDL- CKPIFSLSVTLNINDTPPDI VEPEI SDDDETESVEPI QNKCVDNRETKEVPVQVNQNSLLI SDRDRDENS  391
At2g30580        PWDSKHL- WKPLNFLVDVANGTK  DPKSELG  NASHNDVQGSKTCTKDH  391
At1g28080        DQLLTMR- - - GPS  - - - - - - - - - - - - - - - - - - - - - - - - - - - - - - - - - - - - - - -  378
At5g13250        HRQ- - - QHQTDP- - - - - - - - - - - - - - - - - - - - - - - - - - - - - - - - - - - - - - - - - -  347
    
```

```

Majority      XXXXXX- - - - - XXXXXXXXXXXXXXXK- - - - - GXXX- - XX- XXPXXLP- R- - KRTGXXRRP- - - - -
                    410          420          430          440          450          460          470          480

Gnp4          AMP          GI PQAS  I PTHML RAA  - - - - PPW  LPPWS- P VAAP  PPLLPFPHQ- - - HRA  425
Sb06g014520  HG          I PQAS  I ALVPRA  G  - - - - PPW  LPPWS- P SAVAPPPP  PSLIPFGF- - - GHGA  425
XP_003579650.1      I PQASMQI PDGGPRAG  PP- - - - - WQMP- - PW- SP  A- - - - - Q- - QHQQQP  PFLLPFAHQAAQRA  428
XP_008663842.1      G          PSTATSSVQPAAPPPQLPPQLLLSLQPA  GRPS  - - SSSSAP- - - APAPARAV- - - - - - - - - - - - - - -  447
Os12g0600200      L- - - - - - - - - - - LKSKVQDE  K- - - - - K- - E  VPVATVPF- KRKGPGRGRKPAQP- - - - - - - - - -  433
Os03g0632800      DSP  GSTSVNKTKSREY  MQK- - - - - SKI EDDK  VPL  LKRKNQRTG  RRR- - - - - - - - - - - - - - -  429
Os03g0798200      FT- - - - - - - - - - - R- - - - - - - - - - - - - - - - - - - - - - - - - - - - - - - - - -  429
Os03g0741700      EDKLVVTGR- - - - KVMPC  SNK- - - - - LKVKEENRS  PSQSASSKDKTTSDYELRK- - - - - - - - - -  429
Os12g0479100      - - - - - - - - - - - EAAAG  PSTS  AADPQLPELRLSVLHPG  424
Os01g0928400      - - - - - - - - - - - NGR  PPLFPLPI LRSYHHHHHHQYG- - - - - - - - - - - - - - - - - - - - - - - -  432
At1g06770      SRNQFQGS- - - KTKTKNK  KRK- - - - - CKREDDKSNNGD  PTTSETVTP  KRMRTTQRKR- - - - - - - - - -  429
At3g23060      GQKL- - - - - - - - - - - KNGAATSRSRKK  K- - - - - GKKPVEKSYSLR  PRI G- - - - - - - - - - - - - - - -  427
At2g30580      - - - - - - - - - - - KRKCKLE- - - - - - - - - - - - - - - - - - - - - - - - - - - - - - - - -  429
At1g28080      - - - LMKPQTLLNRG  FSPSSKPWI PQYMAP- - - - - - - - - - - - - - - - - - - - - - - - - - - - - - -  433
At5g13250      - - - MFHTR  PQDMI GPWAAA- - - AF RTP  FVPQNLTQPSSSSSGSL MMPL MGQYFGRSS  423
    
```

Saturday, March 11, 2017 04:29 PM

Majority - - - - - SAXT- GDSSGX DAP- RVVL APPXXXXX- - AAGVWFSLQASPDQEREXPFLPQI PRSYLRI KDGXMTVSL LQKYL

490 500 510 520 530 540 550 560

Gnp4 FYAAPPTTTPPAS SSGFD AI - RVVL PPS AVAA- - AAGVWFV LQAAPLQGRE PFLPQI PRSYLRI KDGR VTVRLLTKYL 503

Sb06g014520 FY TP GAGSGLDAI - RVVL PP S- - AAGVWFALQAAPHQGRE PFLPQI PRSYLRI KDGR VTVRLLTKYL 503

XP\_003579650.1 FYAPGSTAS- - ASGFD TI - RVVL PP PV- - PAGVWFV LQAAPHQGRE PFLPQI PRSYLRI KDGR MPIRLLTKYL 503

XP\_008663842.1 - - - - - APP P AHE- - - - - AG- T- - - - - WFL LRAAPNQRRE E PPLPHI PRSYL RVRDGR MMTV RVVMRYL 503

Os12g0600200 - - - - - PAAAV SS- - HS- - ASKHE KL LT- - PVWFSLI ASFDQKGA PPLPQI PTHYLRI KDDN MPASSIQKYI 503

Os03g0632800 - - - - - ELHAQSDSK - - PEAATQNE KK FSSI WFSLVASFEQEGD PPLPQI PSHYLRI KDGNI PASSIQKYI 503

Os03g0798200 - - - - - KLLMLKNKK KRFKAKQPS KKRR- - FRALWFYLLAAF DQRGV PTLPQLPAKYLRI KDVD LPASIQKYI 503

Os03g0741700 - - - - - GQHA- - DSQQGQI GSTRTGALHDG IT RPVWFL LVPSPDQKQD PRLPQLPTYVRI KDGS LQTSLIQRYI 503

Os12g0479100 - - PGPS SSAS AVGAVVAAPP P AHEAGTWFV LRAAQNQRRE PPLPQI PRSFLRVRDGR MTVRVVMRYL 503

Os01g0928400 - - - - - PLRSSGDL PGVMRVI SPPRRAAADAAGLWLT LQASPDQFRE PI LPQI PKSYLRI KDSN MKVEVVMKYL 503

At1g06770 - - - - - SATTL GDSRN- - LPQPDESSAKQE RR NGPVWFSLVASNDQEGG TSLPQI PANFLRI RDGN TTVSFIQKYI 503

At3g23060 - - - - - TVNPAAGTTTPEAPVSV EEMKVE EGRNNNPVWFSLKPSKTQNI E MLLPPI TACCIRVKDSN MTVSYLKKYL 503

At2g30580 - - - - - SS TFGDSRI PLLPGAASLKQE RR NGH- - VWFSLVASSNQEGE ASLPQI PANYLRI RDGN I PVSFIQKYI 503

At1g28080 - - - - - DEG GAGPSSEFRVLD PPR RPHSGLWFL LQASQFQERE PFLPQV NKSYLRI KDGR I TVRLLTKYL 503

At5g13250 FQPQLI GNDNP DGVAGPSS- SLRVID PPR RPHS GI WFL LQASQNQTVE PFLPQI PKSYLRI KDGK MTVRLLMKYL 503

Majority MNKLGLESESEXVEI TCRGX PVXPXL TLQNL - - - - - LWLXXR- - XXXXXPXRL PASVGSSAKDFVMVLXYGRX- - XXXXXX

570 580 590 600 610 620 630 640

Gnp4 VNKLGLEDESE VEI TCRGRQLLPI LTLQHV- - RDSI W- CRRD- A VSPSAAPDI PTADHHQHI MVLQYGRR- - P 578

Sb06g014520 AGKLGLEDESE VRFIR I LHHNSN - - LL- - P 578

XP\_003579650.1 VNKLGLEDESE VEI TCRGRPLLPFMTLQHL- - RDSI W- CQRD- A VSPLVAPDMSTAN HI MVLQYGRR- - T 578

XP\_008663842.1 VNKLGLDDDSQ LEI TCRGQRLQPTMTLQQV- - RDTI WRPVAVP- AEAAAVLPA- PGSRSTDHI MTLHYCRS- - 578

Os12g0600200 MQKLSLPSETE VEI SCCGQPVNPI QPLRNLI E- - - RWLR- - - FGP ARTLQTV VGSSGGDYVMVI SYGRP KAA 578

Os03g0632800 MQKLGLPNEAE VEI NCCGQPVNPTQPLCNLVE- - - VWLRGRS TQTT- - - QTMI GSPAKEFVMVLT YGRP KAITP 578

Os03g0798200 AQKLNLSSETE VEVL CGGKVVNQGMTLHDLAD- - - CWLEK- - - GP KSRMRSSVGS PATGF MVTLFYRRPDVDVSSSP 578

Os03g0741700 MNKLDLASEDE VEI TCHGEAI SPSTTLQGLLE- - - LWL KSS- - - P VEQVQASLGAQAKEFVMELGYRRPQRPPSS 578

Os12g0479100 VNKL SLEDD S QV- - KG - - VRPS- VTSWVTPHD - - 578

Os01g0928400 AGKLGLTQSH LQRAASSSL L- - - AGQ- K CQRQHLVLI TATKLQGRRRRRRRRG - - 578

At1g06770 MRKLDLESENE I EIKCMGEAVI PTLTLYNLVD- - - LWLQKSS- - - N HQRFAAL VGSSAKDFT MVLVYARKLPECNM 578

At3g23060 MVKLGLESEDQ VEI WLRDEPVCSSLTLHNLVD- - - WWVQTT- - - PL PERQSAMVGSSAAEFI MDLYYSFKSDASDSGS 578

At2g30580 MRKLDLKSEDE VEI TCMGEPVI PTLQLHSLVD- - - LWLETTS- - - K HQRVAASI GSSAKEFVMVLVYSRKLPECNN 578

At1g28080 MKKLELDSESE VNI - - - - - - - - - - - 581

At5g13250 VNKLRL EHE SQQVEI RCRGQEL E PVLTLQHV- - RDAI WRGSRD- TSSLSQNI TL- LPNSSTS D HLMVLHYGRT- - I S 578

Saturday, March 11, 2017 04:29 PM

|                |                         |     |
|----------------|-------------------------|-----|
| Majority       | X X X X X X X X X X X X |     |
|                | -----                   |     |
|                | 650                660  |     |
|                | -----                   |     |
| Gnp4           |                         | 590 |
| Sb06g014520    |                         | 590 |
| XP_003579650.1 |                         | 590 |
| XP_008663842.1 |                         | 590 |
| Os12g0600200   |                         | 590 |
| Os03g0632800   |                         | 590 |
| Os03g0798200   | A P P Q P D T E S C H S | 590 |
| Os03g0741700   |                         | 590 |
| Os12g0479100   |                         | 590 |
| Os01g0928400   |                         | 590 |
| At1g06770      |                         | 590 |
| At3g23060      | A S E                   | 590 |
| At2g30580      |                         | 590 |
| At1g28080      |                         | 590 |
| At5g13250      |                         | 590 |

Decoration 'Decoration #1': Shade (with solid black) residues that match the Consensus exactly.
